# Supplementary material
Source: publisher figshare collection journal article supplement (https://acs.figshare.com/ndownloader/files/23746521)
Supplement: Supplementary file 1 [file 23746521]

## Supporting Information

### Highly-crystallized Fe<sub>2</sub>P-embedded in N-doped carbon for enhancing long-term bio-electricity generation by lowering cathode poisoning in microbial fuel cells

Peng Zhang<sup>a</sup>, Zhuang Cai<sup>a</sup>, Shijie You<sup>b</sup>, Fangyu Wang<sup>a</sup>, Ying Dai<sup>a,c,\*</sup>, Yuan Lv<sup>a</sup>, Yanhong Zhang<sup>a,\*</sup>,  
Nanqi Ren<sup>b</sup>, Jinlong Zou<sup>a,\*</sup>

<sup>a</sup> Key Laboratory of Functional Inorganic Material Chemistry, Ministry of Education of the People's Republic of China, School of Chemistry and Materials Science, Heilongjiang University, Xuefu Road 74<sup>#</sup>, Nangang District, Harbin, 150080, China;

<sup>b</sup> State Key Laboratory of Urban Water Resource and Environment, School of Environment, Huanghe Road 73<sup>#</sup>, Nangang District, Harbin Institute of Technology, Harbin 150090, P. R. China;

<sup>c</sup>School of Civil Engineering, Heilongjiang Institute of Technology, Hongqi Street 999<sup>#</sup>, Daowai District, Harbin 150050, China.

#### Corresponding author (s):

\*Ying Dai, Yanhong Zhang, Jinlong Zou.

<sup>a</sup>Xuefu Road 74<sup>#</sup>, Nangang District, Harbin, 150080, China.

E-mail address:

zjh\_0308@126.com (Y. Dai);

zhangyanhong@hlju.edu.cn (Y. H. Zhang);

zoujinlong@aliyun.com (J. L. Zou).

1    **Number of pages:** 21

2    **Number of figures:** 8

3    **Number of tables:** 4

4

## 1    **Material characterization**

2    X-ray diffraction (XPD) data were collected to pass a Rigaku D /max-III diffractometer ( $\lambda = 1.5406$   
3    Å) at a step scan speed of  $0.02^\circ$  over the range of  $10^\circ$ - $80^\circ$ . The catalyst crystal structure data was  
4    analyzed according to the Joint Committee Powder Diffraction Standard (JCPDS). The nitrogen  
5    adsorption/desorption isotherms were measured at 77 K using the Micromeritics Tristar II. The  
6    specific surface areas ( $S_{\text{BET}}$ ) of composites were calculated by using Brunauere-Emmette-Teller  
7    (BET) method, meanwhile the pore size distributions were obtained by using  
8    Barrett-Joyner-Halenda (BJH) method. Scanning electron microscopy (SEM) images were taken on  
9    an S-4800 scanning electron microscope (Japan) at 5.0 kV. The images were used to investigate the  
10    internal structure of  $\text{Fe}_2\text{P/NPGC-x}$ . Transmission electron microscopy (TEM) images were obtained  
11    on the JEM-2100 electron microscope (JEOL) at 200 kV. X-ray photoelectron spectroscopy (XPS)  
12    tests were conducted on Kratos-AXISUL TRA DLD (Al  $K\alpha$  X-ray source) and the XPS data for  
13    each atom were fitted using the 'XPS peak' software.

14

## 15    **Material electrochemical analysis**

16    The ORR performances characterized by cyclic voltammetry (CV), linear sweep voltammetry  
17    (LSV), rotating disk electrode (RDE) and electrochemical impedance spectroscopy (EIS) were  
18    carried out on a CHI 760E electrochemical workstation (Shanghai Chenhua) in a three-electrode  
19    cell connected to a computer. The CV scan was performed in the potential range from  $-0.8$  to  $+0.3$   
20    V at a scan rate of  $50 \text{ mV s}^{-1}$  in three-electrode system. The working electrode for CV was a glassy  
21    carbon electrode, which was 0.4 cm in diameter. The catalyst ink for CV test was prepared by  
22    adding 5mg well-dispersed samples into the mixed solution with 100  $\mu\text{m}$  ethanol and 50  $\mu\text{m}$  Nafion

1 (5 wt.% solution), then treated ultrasonically for 30 min. 5  $\mu\text{m}$  ink suspension was dropped onto the  
 2 glassy carbon electrode and dried in air. LSV tests were carried out by using the cathodes of MFCs  
 3 as the working electrode, equipping with 1  $\text{cm}^2$  platinum sheet square counter electrode and an SCE  
 4 reference electrode. It was measured at a scan rate of 1  $\text{mV s}^{-1}$  on the cathodes of the tested MFCs  
 5 with 28 mL of 50 mM PBS. The electrochemical impedance spectroscopy (EIS) was conducted at  
 6 the open circuit voltage ( $V_{\text{oc}}$ ) of 10 mV over a wide frequency range from  $10^5$  to  $10^{-2}$  Hz.  
 7 ZsimpWin 3.10 software (Echem, Lufkin, TX) to calculate charge transfer resistance ( $R_{\text{CT}}$ ) by using  
 8 the EIS data. The polarization and power density curves were acquired by varying the external  
 9 resistance from 5000 to 50  $\Omega$ . The potassium dichromate oxidation method was used to test the  
 10 chemical oxygen demand (COD) of effluents. The coulombic efficiency (CE) was calculated  
 11 according to the previously reported method.<sup>1</sup>

12  
 13 The rotating disk electrode (RDE) test by changing different rotation rates (from 225 to 2025 rpm,  
 14 and scan rate of 5  $\text{mV s}^{-1}$ ), what in  $\text{O}_2$ -saturated 50 mM PBS electrolyte. RDE test were obtained in  
 15 the potential range from +0.6 to 1.0 V (vs Ag/AgCl), that the results according to the Koutecky-  
 16 Levich (K-L) plots. Based on the K-L equation to calculate the average number of transferred  
 17 electrons ( $n$ ) from the following Eqs. 1:

$$18 \quad \frac{1}{j} = \frac{1}{j_K} + \frac{1}{0.2nFC_0D_0^{2/3}v^{-1/6}\omega^{1/2}} \quad (1)$$

19 where  $j$ , and  $j_K$  are the measured current density ( $\text{mA cm}^{-2}$ ), and kinetic current density,  
 20 respectively;  $F$  is the Faraday constant ( $96485 \text{ C mol}^{-1}$ );  $C_0$  is the concentration of  $\text{O}_2$  in PBS ( $1.2 \times$   
 21  $10^{-6} \text{ mol cm}^{-3}$ );  $D_0$  is the diffusion coefficient of  $\text{O}_2$  in PBS ( $1.9 \times 10^{-5} \text{ cm}^2 \text{ s}^{-1}$ );  $v$  is the kinematic  
 22 viscosity of PBS ( $1.0 \times 10^{-2} \text{ cm}^2 \text{ s}^{-1}$ ); and  $\omega$  is the rotation rate of the electrode.<sup>2</sup>

1  
2  
3  
4  
5  
6  
7  
8  
9  
10  
11  
12  
13  
14  
15  
16  
17  
18  
19  
20  
21  
22

**Electrode preparation for MFCs**

Carbon fiber brush as the anode was washed by acetone and distilled water several times, which was then heated in air at 450 °C according to the previously reported method.<sup>3</sup> The gas diffusion layer (GDL) of the air cathode was prepared using the rolling method. Carbon black and 60 wt.% PTFE (mass ratio of 7: 3) were rolled onto stainless steel nets (60 mesh), which was then calcined at 340 °C for 30 min in a muffle furnace to obtain the GDL.<sup>4</sup> The catalyst mixed with PTFE (mass ratio of 2: 1) was uniformly rolled onto the other side of GDL, which was then dried at 80 °C in an oven. The Fe<sub>2</sub>P/NPGC-x (750, 800, 850, 900 and 950) were used as the cathodic catalysts by comparing with the commercial Pt/C (10 wt.%, Hesent Electric Co., Ltd, Shanghai, China) catalyst. Escherichia coli (E. coli) bacteria are used as the electrogenic bacteria and inoculants to activate the reactors in our study, which have been already recognized as the efficient bacteria for MFCs.<sup>1,3,5</sup>

**MFCs configuration and operation**

The single-chamber reactor (air cathode) was consisted of a cylindrical plexiglas chamber, which had lengths of 4 cm, diameters of 3 cm and inner volume of approximately 28 mL.<sup>6</sup> The titanium wire was used to connect the two electrodes with external resistance of 1000Ω. Two rubber gaskets were used to prevent the air into the reactor. The electrolyte composed of phosphate buffered solution (PBS, pH=7.4), vitamins minerals (5 mL L<sup>-1</sup>) and trace (12.5 mL L<sup>-1</sup>) was the same as that of the previous study.<sup>4</sup> All of the reactors were operated at 30 °C. To achieve statistical soundness, each reactor at least had another two parallel samples.

## 1    **Electrocatalytic activity of Fe<sub>2</sub>P/NPGC in neutral solution**

2    To evaluate the ORR catalytic activity, CV tests are performed for Fe<sub>2</sub>P/NPGC-x (750, 800, 850,  
3    900 and 950) and Pt/C catalysts in MFCs. As shown in Figure S7a, no redox peaks can be detected  
4    on CV curve, which may be caused by the limitation of the testing method.<sup>6</sup> The highest current  
5    density is still obtained by Fe<sub>2</sub>P/NPGC-850 (−6.23 mA cm<sup>−2</sup>), which is higher than those of Pt/C (−  
6    5.19 mA cm<sup>−2</sup>) and other Fe<sub>2</sub>P/NPGC composites. LSV tests are also conducted to evaluate the  
7    ORR activities of Fe<sub>2</sub>P/NPGC and Pt/C. As shown in Figure S7b, Fe<sub>2</sub>P/NPGC-850 has the  
8    maximum current density (−2.5 mA cm<sup>−2</sup>), which is higher than that of Pt/C (−2.22 mA cm<sup>−2</sup>),  
9    demonstrating that this catalyst may exhibit a favorably efficient ORR activity in MFCs, consistent  
10    with the results of CV tests. The high ORR catalytic activity is mainly attributed to the rapid capture  
11    and the low resistance transfer of oxygen.<sup>5</sup> Through XPS and FT-IR tests, oxygen-containing  
12    functional groups on the catalyst surface are confirmed to be present and enhancing the ability to  
13    capture oxygen in the electrolyte solution.<sup>7-9</sup> The S<sub>BET</sub> tests show that the pore size of the  
14    Fe<sub>2</sub>P/NPGC-850 catalyst is significantly larger than the diameter of the oxygen molecule, which  
15    enable the transportation of oxygen into the Fe<sub>2</sub>P/NPGC-850 with hardly any resistance.<sup>10</sup> And, the  
16    N-doped structure improve the electronic activity of the outermost layer of adjacent C atoms, that  
17    provide the smooth transmission path for O<sub>2</sub>.<sup>11</sup> Moreover, oxygen is quickly adsorbed to the Fe<sub>2</sub>P  
18    surface by weakly basic P atoms, and the rapid cleavage of O–O bonds by Fe<sup>2+</sup>, thus leading to an  
19    increase in the ORR efficiency.<sup>12</sup>

**Table S1.** Nitrogen atomic weight percentage (wt.%) of various chemical states in Fe<sub>2</sub>P/NPGC-x

(x=700 (a), 750 (b), 800 (c), 850 (d) and 900 (e)).

| Samples                    | Pyridinic N | Pyrrolic N | Graphitic N | Total N |
|----------------------------|-------------|------------|-------------|---------|
| Fe <sub>2</sub> P/NPGC-700 | 21.29       | 69.77      | 8.94        | 2.13    |
| Fe <sub>2</sub> P/NPGC-750 | 43.61       | 47.42      | 8.97        | 3.98    |
| Fe <sub>2</sub> P/NPGC-800 | 45.33       | 46.6       | 8.07        | 4.96    |
| Fe <sub>2</sub> P/NPGC-850 | 51.3        | 35.21      | 13.49       | 6.53    |
| Fe <sub>2</sub> P/NPGC-900 | 56.76       | 34.23      | 9.01        | 5.71    |

**Table S2.** Textural property of the Fe<sub>2</sub>P/NPGC-x (x=700, 750, 800, 850 and 900) composites.

| Samples                    | BET surface area                  | Pore volume                        | Average pore width |
|----------------------------|-----------------------------------|------------------------------------|--------------------|
|                            | (m <sup>2</sup> g <sup>-1</sup> ) | (cm <sup>3</sup> g <sup>-1</sup> ) | (nm)               |
| Fe <sub>2</sub> P/NPGC-700 | 16.86                             | 0.03                               | 6.20               |
| Fe <sub>2</sub> P/NPGC-750 | 20.18                             | 0.06                               | 7.41               |
| Fe <sub>2</sub> P/NPGC-800 | 24.63                             | 0.06                               | 7.60               |
| Fe <sub>2</sub> P/NPGC-850 | 33.77                             | 0.07                               | 10.02              |
| Fe <sub>2</sub> P/NPGC-900 | 26.85                             | 0.06                               | 8.73               |

1

**Table S3.** Summary of performances of various cathode catalysts in MFCs.

| Catalysts                                      | P <sub>MAX</sub> (W m <sup>-2</sup> ) | Voltage output (V) | Operation time (h) | References |
|------------------------------------------------|---------------------------------------|--------------------|--------------------|------------|
| Fe <sub>2</sub> P/NPGC-850                     | 1.05                                  | 0.535              | 1440               | This work  |
| Co <sub>2</sub> P/NC-850                       | 0.773                                 | 0.145              | 450                | 6          |
| Fe/Fe <sub>3</sub> O <sub>4</sub> /FeS/NGC-900 | 0.93                                  | 0.59               | 2160               | 13         |
| GO-Zn/Co-800                                   | 0.972                                 | 0.554              | 2000               | 14         |
| CA-10KOH                                       | 0.967                                 | 0.39               | 500                | 15         |
| C(N)/MnO <sub>x</sub> -SP                      | 0.467                                 | 0.35               | 450                | 16         |
| MOF-800                                        | 0.326                                 | 0.365              | 720                | 17         |
| GF-CoMn <sub>2</sub> O <sub>4</sub> /rGO       | 0.361                                 | 0.822              | 1680               | 18         |
| Co-Al <sub>2</sub> O <sub>3</sub> -rGO         | 0.548                                 | 0.631              | 720                | 19         |
| FePc/PID/CNTs                                  | 0.799                                 | 0.51               | 700                | 20         |

2

3

**Table S4.** The electrochemical impedance fitting results of Fe<sub>2</sub>P/NPGC-x (x=700, 750, 800, 850 and 900).

| Cathodes                   | R <sub>0</sub> (Ω) | R <sub>ct</sub> (Ω) |
|----------------------------|--------------------|---------------------|
| Fe <sub>2</sub> P/NPGC-700 | 3.334±0.4          | 24.1±0.3            |
| Fe <sub>2</sub> P/NPGC-750 | 3.178±0.2          | 21.3±0.5            |
| Fe <sub>2</sub> P/NPGC-800 | 2.954±0.3          | 18.5±0.3            |
| Fe <sub>2</sub> P/NPGC-850 | 1.679±0.2          | 9.5±0.4             |
| Fe <sub>2</sub> P/NPGC-900 | 2.674±0.3          | 16.6±0.4            |
| Pt/C                       | 2.172±0.2          | 11.6±0.5            |

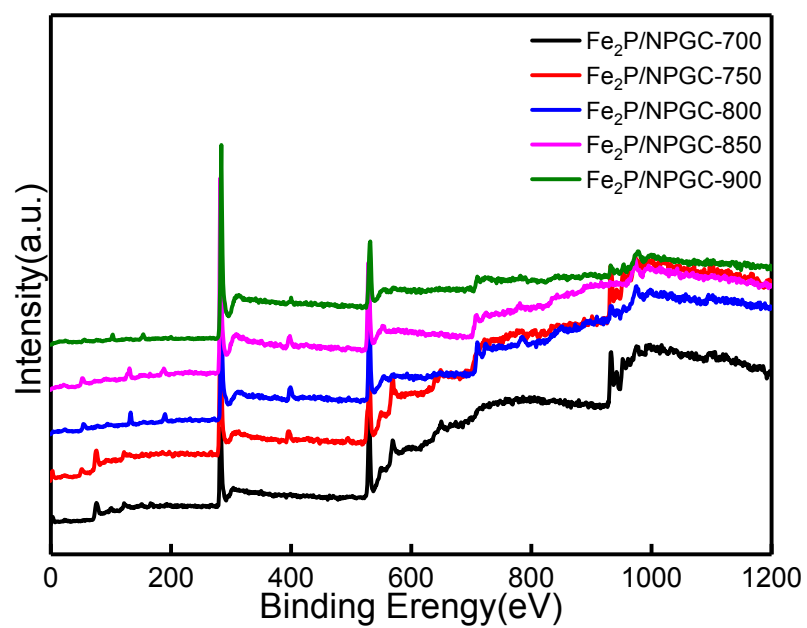

**Figure S1.** The XPS survey spectra of the  $\text{Fe}_2\text{P}/\text{NPGC-x}$  ( $x=700, 750, 800$  and  $900$ ).

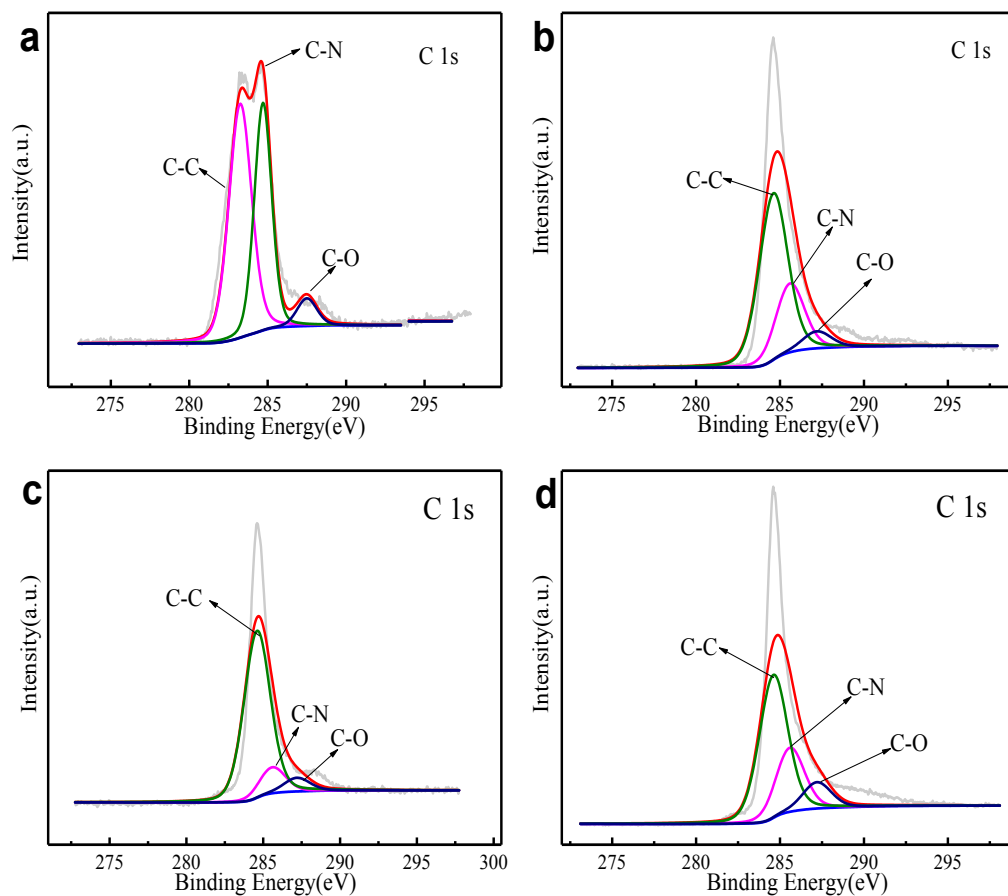

**Figure S2.** High resolution XPS spectra of C 1s of Fe<sub>2</sub>P/NPGC-x (x= 700, 750, 800 and 900).

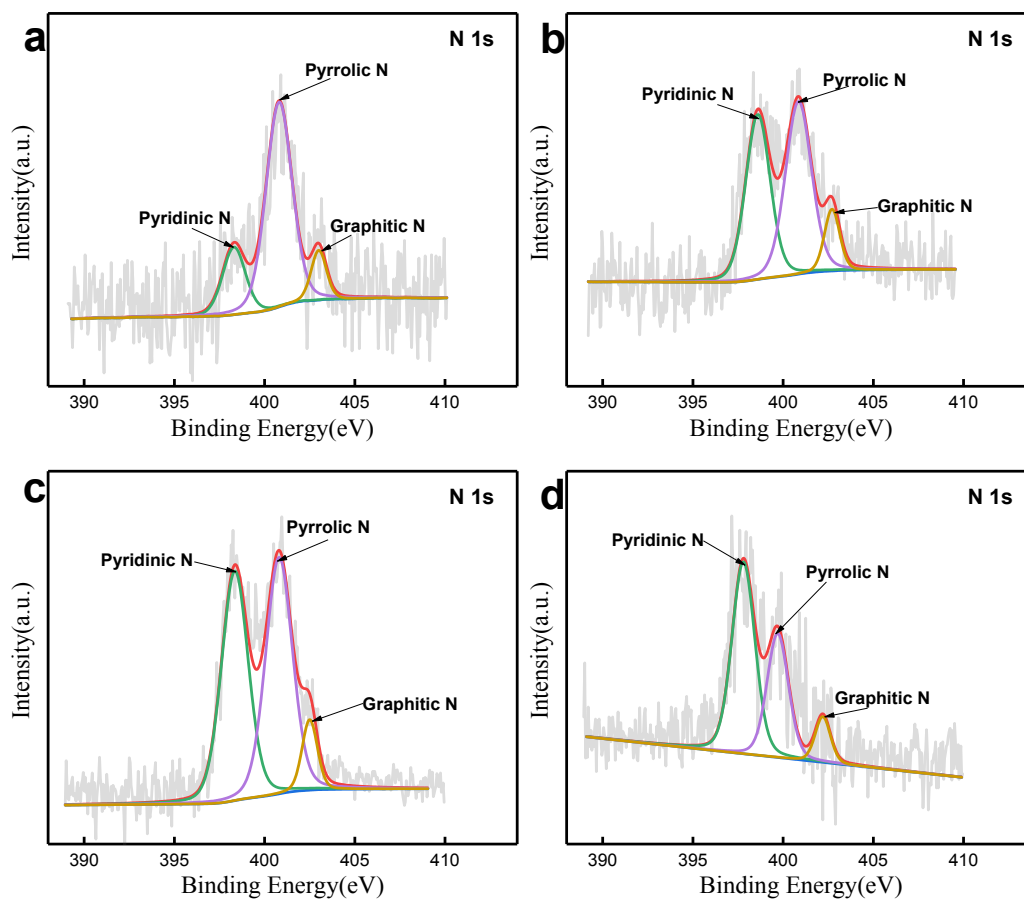

**Figure S3.** High resolution XPS spectra of N 1s of Fe<sub>2</sub>P/NPGC-x (x= 700, 750, 800 and 900).

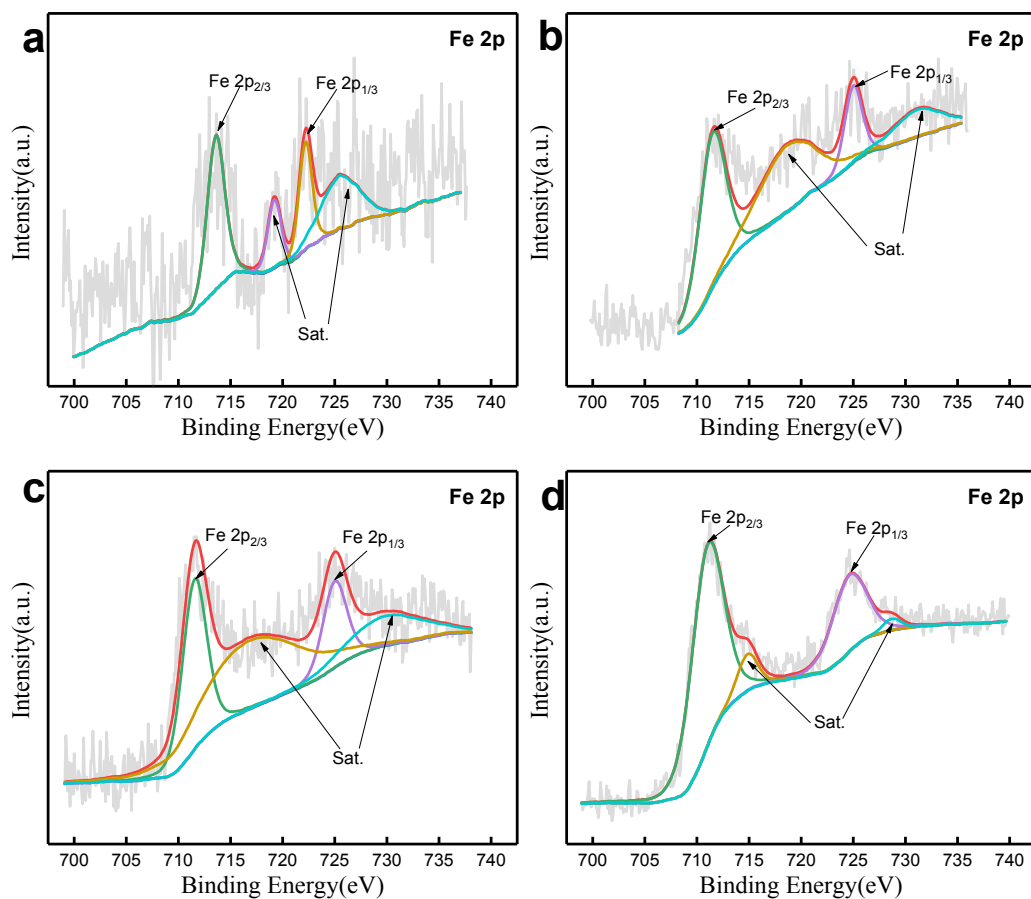

**Figure S4.** High resolution XPS spectra of Fe 2p of Fe<sub>2</sub>P/NPGC-x (x= 700, 750, 800 and 900).

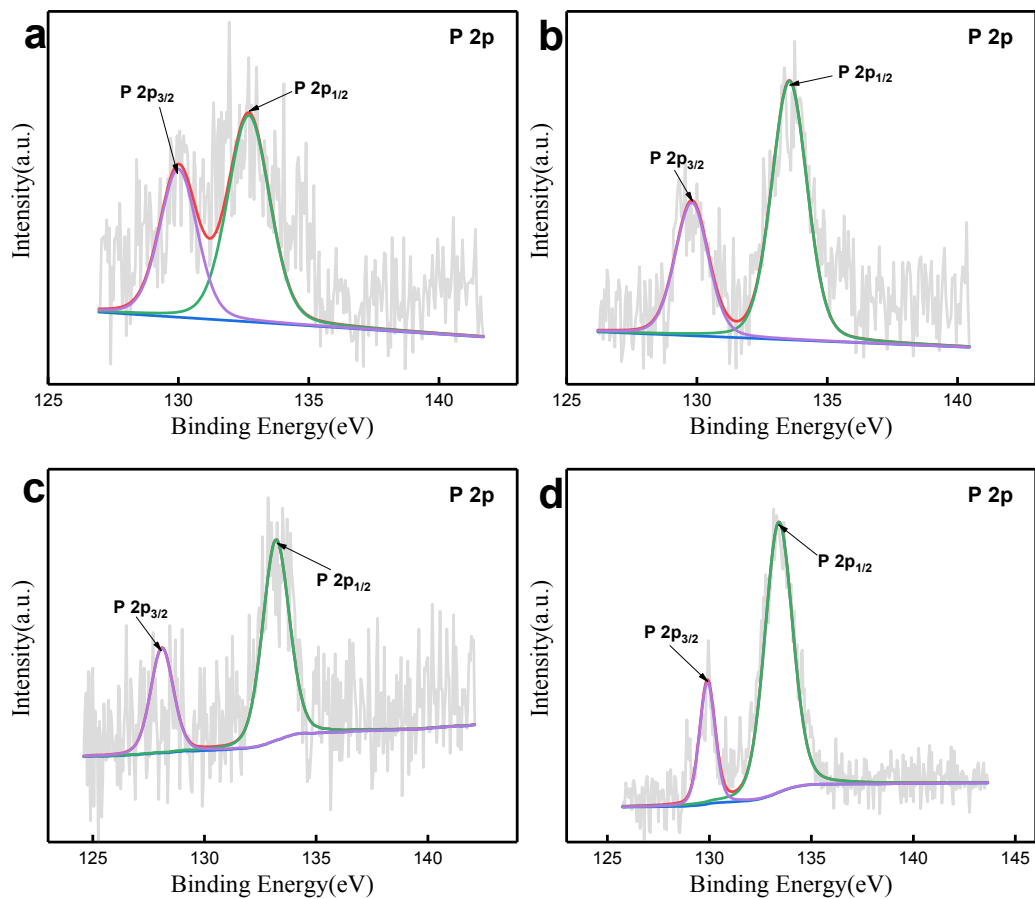

**Figure S5.** High resolution XPS spectra of P 2p of Fe<sub>2</sub>P/NPGC-x (x= 700, 750, 800 and 900).

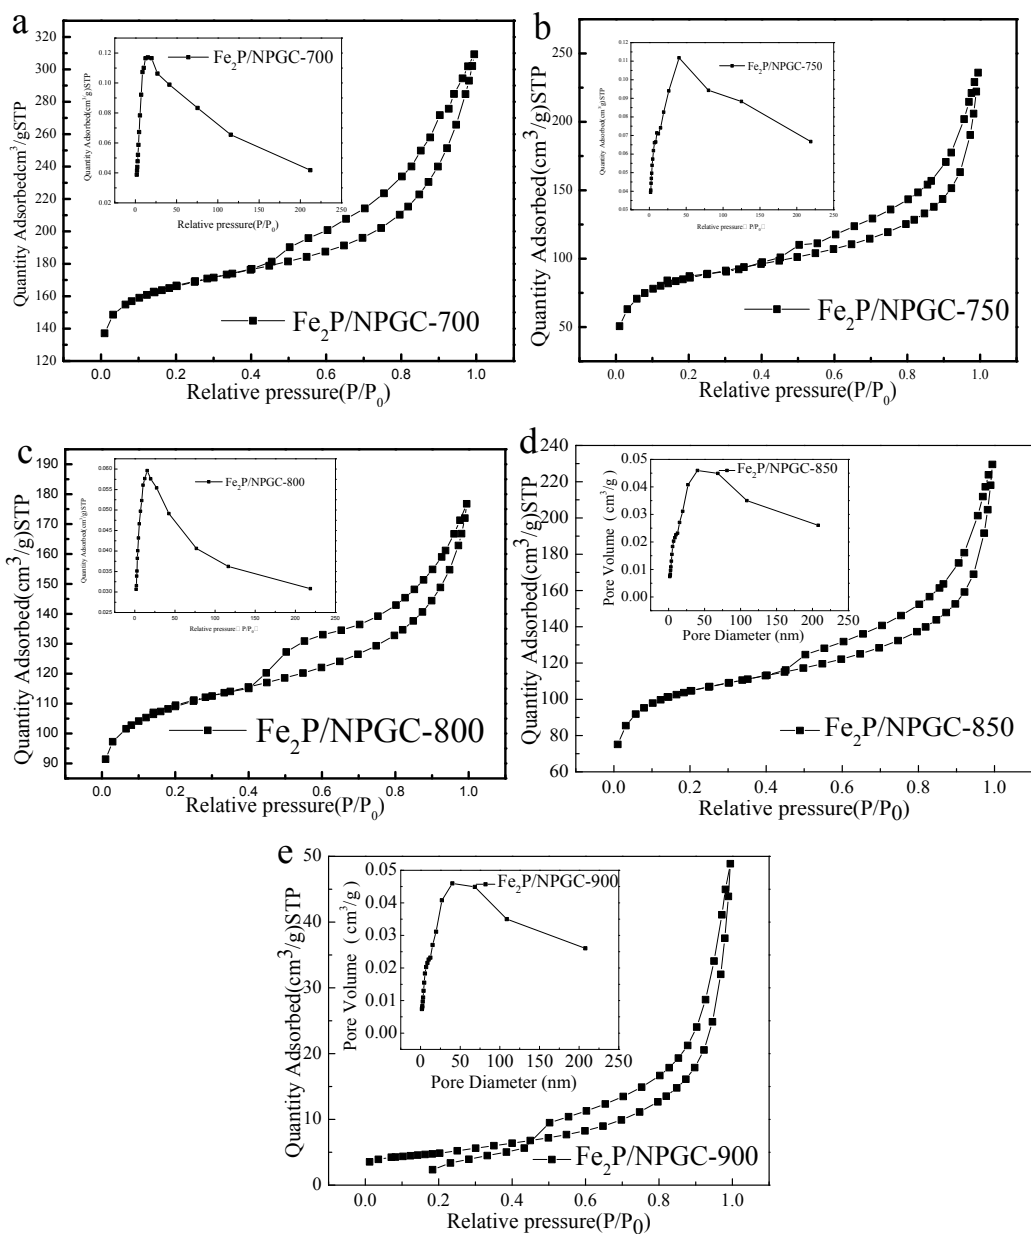

**Figure S6.** N<sub>2</sub> adsorption/desorption isotherms and pore size distributions (inset) for the Fe<sub>2</sub>P/NPGC-x (x=700, 750, 800, 850 and 900).

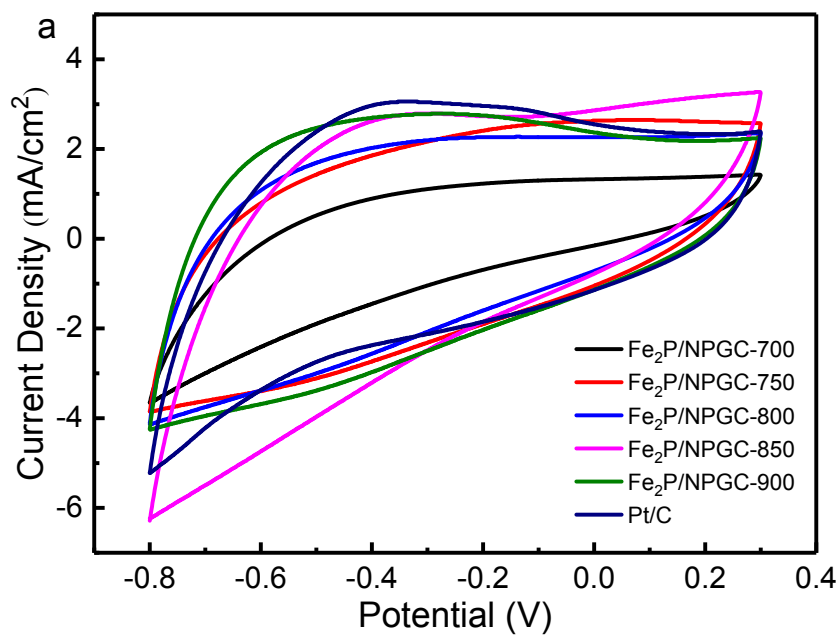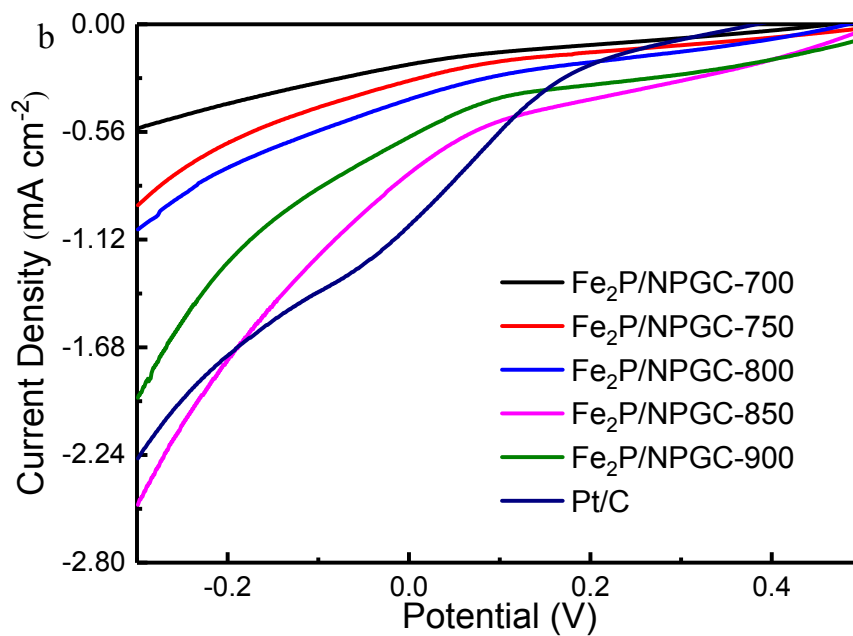

**Figure S7.** CV (a) and LSV (b) curves of  $\text{Fe}_2\text{P}/\text{NPGC}-x$  ( $x=700, 750, 800, 850$  and  $900$ ) and  $\text{Pt}/\text{C}$ .

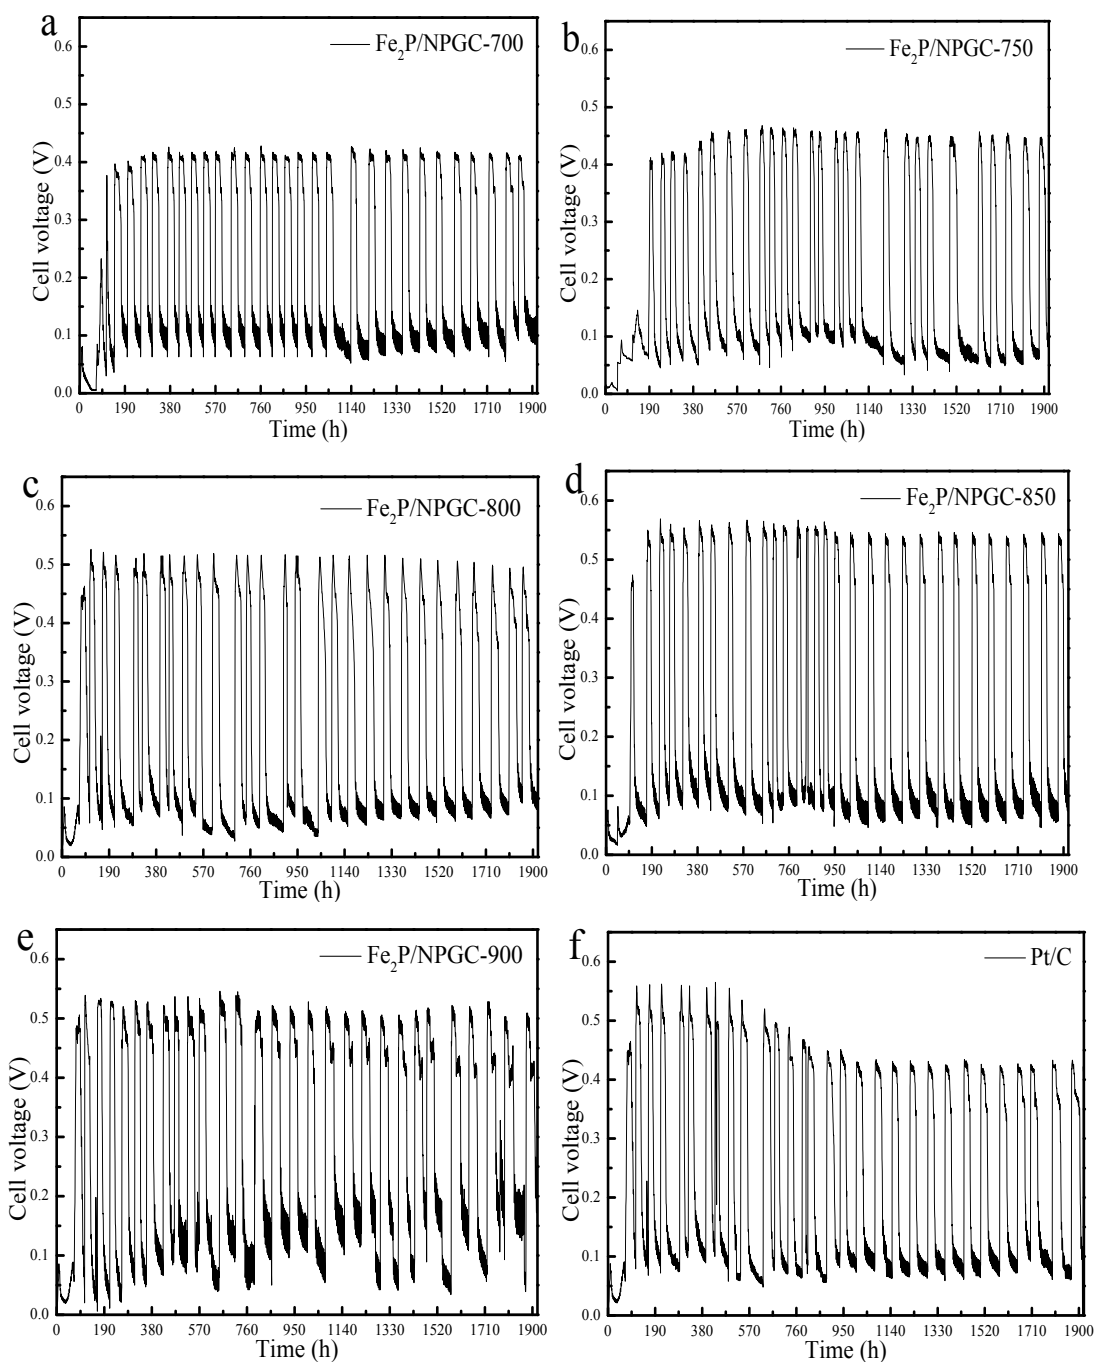

**Figure S8.** Voltage output of MFCs with the  $\text{Fe}_2\text{P/NPGC-x}$  ( $x=700$  (a), 750 (b), 800 (c), 850 (d), and 900 (e)) and Pt/C (f) cathodes.

## 1    **References**

- 2    (1) Jing, B. J.; You, S. J.; Ma, Y. Y.; Xing, Z. P.; Chen, H.; Dai, Y.; Zhang, C. Y.; Ren, N. Q.; Zou,  
3    J. L. Fe<sub>3</sub>Se<sub>4</sub>/FeSe Heterojunctions in Cornstalk-Derived N-Doped Carbon Framework Enhance  
4    Charge Transfer and Cathodic Oxygen Reduction Reaction to boost Bio-Electricity Generation.  
5    Appl. Catal., B **2019**, *244*, 465-474, DOI 10.1016/j.apcatb.2018.11.074.
- 6    (2) Pan, S. Y.; Cai, Z.; Duan, Y. Q.; Yang, L.; Tang, B.; Jing, B. J.; Dai, Y.; Xu, X.; Zou, J. L.  
7    Tungsten Diselenide/Porous Carbon with Sufficient Active Edge-Sites as a Co-Catalyst/Pt-Support  
8    Favoring Excellent Tolerance to Methanol-Crossover for Oxygen Reduction Reaction in Acidic  
9    Medium. Appl. Catal., B **2017**, *219*, 18-29, DOI 10.1016/j.apcatb.2017.07.011.
- 10    (3) Hao, L.; Yu, J.; Xu, X.; Yang, L.; Xing, Z. P.; Dai, Y.; Sun, Y.; Zou, J. L. Nitrogen-Doped  
11    MoS<sub>2</sub>/Carbon as Highly Oxygen-Permeable and Stable Catalysts for Oxygen Reduction Reaction in  
12    Microbial Fuel Cells. J. Power Sources **2017**, *339*, 68–79, DOI 10.1016/j.jpowsour.2016.11.041.
- 13    (4) Dong, H.; Yu, H. B.; Wang, X.; Zhou, Q. X.; Feng, J. L. A Novel Structure of Scalable  
14    Aircathode without Nafion and Pt by Rolling Activated Carbon and PTFE as Catalyst Layer in  
15    Microbial Fuel Cells. Water Res. **2012**, *46*, 5777–5787, DOI 10.1016/j.watres.2012.08.005.
- 16    (5) Watson, V. J.; Delgado, C. N.; Logan, B. E. Influence of Chemical and Physical Properties of  
17    Activated Carbon Powders on Oxygen Reduction and Microbial Fuel Cell Performance. Environ.  
18    Sci. Technol. **2013**, *47*, 6704–6710, DOI 10.1021/es401722j.
- 19    (6) X. Xu, S.J. You, L. Yang, Z.P. Xing, S.Y. Pan, Z. Cai, Y. Dai, J.L. Zou, Highly Efficient  
20    Charge Transfer in Co/Co<sub>2</sub>P Schottky Junctions Embedded in Nitrogen-Doped Porous Carbon for  
21    Enhancing Bioelectricity Generation, Biosens. Bioelectron. **2018**, *102*, 101-105, DOI  
22    10.1016/j.bios.2017.11.022.
- 23    (7) Xiong, C.; Wei, Z. D.; Hu, B. H.; Chen, S. G.; Li, L.; Guo, L.; Ding, W.; Liu, X.; Ji, W. J.;  
24    Wang, X. P. Nitrogen-Doped Carbon Nanotubes as Catalysts for Oxygen Reduction Reaction. J.  
25    Power Sources **2012**, *215*, 216-220, DOI 10.1016/j.jpowsour.2012.04.057.

- (8) Zhao, A. Q.; Masa, J.; Xia, W.; Maljusch, A.; Willinger, M. G.; Clavel, G.; Xie, K.; Schloegl, R.; Schuhmann, W.; Muhlert, M. Spinel Mn-Co Oxide in N-Doped Carbon Nanotubes as a Bifunctional Electrocatalyst Synthesized by Oxidative Cutting. *J. Am. Chem. Soc.* **2014**, *136*, 7551-7554, DOI 10.1021/ja502532y.
- (9) Lv, Y.; Lin, Y. H.; Yang, L.; Cai, Z.; Jing, B. J.; Yu, J.; Jiang, X.; Xing, Z.; Zou, J. L. Iron (III) Metaphosphate/Iron Phosphide Heterojunctions Embedded in Partly-Graphitized Carbon for Enhancing Charge Transfer and Power Generation in Microbial Fuel Cells. *Chem. Eng. J.* **2018**, *342*, 228-237, DOI 10.1016/j.cej.2018.02.083.
- (10) Feng, L. G.; Chang, J. F.; Jiang, K.; Xue, H. G.; Liu, C. P.; Cai, W. B.; Xing, W.; Zhang, J. J. Nanostructured Palladium Catalyst Poisoning Depressed by Cobalt Phosphide in the Electro-oxidation of Formic Acid for Fuel Cells. *Nano Energy* **2016**, *30*, 355-361, DOI 10.1016/j.nanoen.2016.10.023.
- (11) Arrigo, R.; Schuster, M. E.; Xie, Z.; Yi, Y.; Wowsnick, G.; Sun, L. L.; Hermann, K. E.; Friedrich, M.; Kast, P.; Haevecker, M.; Knop-Gericke, A.; Schloegl, R. Nature of the N-Pd Interaction in Nitrogen-Doped Carbon Nanotube Catalysts. *ACS Catal.* **2015**, *5*, 2740-2753, DOI 10.1021/acscatal.5b00094.
- (12) Tian, J. Q.; Liu, Q.; Liang, Y. H.; Xing, Z. C.; Asiri, A. M.; Sun, X. P. FeP Nanoparticles Film Grown on Carbon Cloth: An Ultrahighly Active 3D Hydrogen Evolution Cathode in Both Acidic and Neutral Solutions. *ACS Appl. Mater. Interfaces* **2014**, *6*, 20579-20584, DOI 10.1021/am5064684.
- (13) Yang, W.; Chata, G.; Zhang, Y. D.; Peng, Y.; Lu, J. E.; Wang, N.; Mercado, R.; Li, J.; Chen, S. W. Graphene Oxide-Supported Zinc Cobalt Oxides as Effective Cathode Catalysts for Microbial Fuel Cell: High Catalytic Activity and Inhibition of Biofilm Formation. *Nano Energy* **2019**, *57*, 811-819, DOI 10.1016/j.nanoen.2018.12.089.
- (14) Xu, X.; Dai, Y.; Yu, J.; Hao, L.; Duan, Y. Q.; Sun, Y.; Zhang, Y. H.; Lin, Y. H.; Zou, J. L.

- 1 Metallic State FeS Anchored (Fe)/Fe<sub>3</sub>O<sub>4</sub>/N-Doped Graphitic Carbon with Porous Sponge-Like  
2 Structure as Durable Catalysts for Enhancing Bioelectricity Generation. ACS Appl. Mater.  
3 Interfaces **2017**, 9, 10777-10787, DOI 10.1021/acsami.7b01531.
- 4 (15) Tian, X. Y.; Zhou, M. H.; Tan, C. L.; Li, M.; Liang, L.; Li, K.; Su, P. KOH Activated N-Doped  
5 Novel Carbon Aerogel as Efficient Metal-Free Oxygen Reduction Catalyst for Microbial Fuel Cells.  
6 Chem. Eng. J. **2018**, 348, 775-785, DOI 10.1016/j.cej.2018.05.007.
- 7 (16) Shahbazi Farahani, F.; Mecheri, B.; Reza Majidi, M.; Costa de Oliveira, M. A.; D'Epifanio, A.;  
8 Zurlo, F.; Placidi, E.; Arciprete, F.; Licoccia, S. MnO<sub>x</sub>-Based Electrocatalysts for Enhanced Oxygen  
9 Reduction in Microbial Fuel Cell Air Cathodes. J. Power Sources **2018**, 390, 45-53, DOI  
10 10.1016/j.jpowsour.2018.04.030.
- 11 (17) Zhang, L. H.; Hu, Y. Y.; Chen, J. F.; Huang, W. T.; Cheng, J. H.; Chen, Y. C. A novel Metal  
12 Organic Framework-Derived Carbon-Based Catalyst for Oxygen Reduction Reaction in a Microbial  
13 Fuel Cell. J. Power Sources **2018**, 384, 98-106, DOI 10.1016/j.jpowsour.2018.02.078.
- 14 (18) Hu, Z. X.; Zhou, X. X.; Lu, Y.; Jv, R.; Liu, Y.; Li, N.; Chen, S. W. CoMn<sub>2</sub>O<sub>4</sub> Doped Reduced  
15 Graphene Oxide as an Effective Cathodic Electrocatalyst for ORR in Microbial Fuel Cells.  
16 Electrochim. Acta **2019**, 296, 214-223, DOI 10.1016/j.electacta.2018.11.004.
- 17 (19) Papiya, F.; Nandy, A.; Mondal, S.; Kundu, P. P. Co/Al<sub>2</sub>O<sub>3</sub>-rGO Nanocomposite as Cathode  
18 Electrocatalyst for Superior Oxygen Reduction in Microbial Fuel Cell Applications: The Effect of  
19 Nanocomposite Composition. Electrochim. Acta **2017**, 254, 1-13, DOI  
20 10.1016/j.electacta.2017.09.108
- 21 (20) Nguyen, M. T.; Mecheri, B.; Iannaci, A.; D'Epifanio, A.; Licoccia, S. Iron/Polyindole-Based  
22 Electrocatalysts to Enhance Oxygen Reduction in Microbial Fuel Cells. Electrochim. Acta **2016**,  
23 190, 388-395, DOI 10.1016/j.electacta.2015.12.105.

24
